# Supplementary material for: A Systematic Analysis Reveals Heterogeneous Changes in the Endocytic Activities of Cancer Cells
Source: Oxford University Press journal article supplement (doi:10.1158/0008-5472.can-15-0939), 2015-09-11
Supplement: 00085472can150939-sup-147989_1_supp_3041875_nqs1pg.docx [file 00085472can150939-sup-147989_1_supp_3041875_nqs1pg.docx]

| |  | | --- | |  | |  | |  | | CME-TfnR Uptake | STDEV | CavME-Albumin Uptake | STDEV | CIE-CD44 Uptake | STDEV | CIE-CD59 Uptake | STDEV |
| --- | --- | --- | --- | --- | --- | --- | --- | --- | --- | --- | --- | --- |
| ***H157*** | | 0.474 | | --- | | ±0.176 | 0.770 | ±0.249 | 0.108 | ±0.027 | 0.119 | ±0.090 |
| ***H441*** | 0.298 | ±0.107 | 0.764 | ±0.296 | 0.313 | ±0.159 | 0.087 | ±0.065 |
| ***H1299*** | 0.761 | ±0.175 | 0.852 | ±0.207 | 0.167 | ±0.121 | 0.120 | ±0.083 |
| ***H1355*** | 0.517 | ±0.078 | 0.932 | ±0.354 | 0.135 | ±0.065 | 0.138 | ±0.141 |
| ***H1792*** | 0.403 | ±0.145 | 0.723 | ±0.138 | 0.116 | ±0.084 | 0.113 | ±0.031 |
| ***H1819*** | 0.342 | ±0.133 | 0.987 | ±0.484 | 0.141 | ±0.088 | 0.151 | ±0.137 |
| ***Hcc44*** | 0.535 | ±0.267 | 0.729 | ±0.193 | 0.180 | ±0.116 | 0.291 | ±0.225 |
| ***Hcc4017*** | 0.440 | ±0.183 | 0.861 | ±0.350 | 0.151 | ±0.093 | 0.126 | ±0.025 |
| ***A549*** | 0.484 | ±0.164 | 0.897 | ±0.258 | 0.572 | ±0.333 | 0.270 | ±0.180 |
| ***H2052*** | 0.556 | ±0.205 | 1.144 | ±0.300 | 0.840 | ±0.309 | 0.312 | ±0.096 |
| ***H2073*** | 0.453 | ±0.087 | 1.239 | ±0.279 | 0.823 | ±0.184 | 0.251 | ±0.042 |
| ***H2122*** | 0.461 | ±0.109 | 1.037 | ±0.312 | 1.679 | ±0.397 | 0.326 | ±0.067 |
| ***H2172*** | 0.644 | ±0.189 | 0.967 | ±0.156 | 6.627 | ±1.185 | 0.328 | ±0.189 |
| ***Hcc193*** | 0.841 | ±0.356 | 1.149 | ±0.430 | 1.375 | ±0.318 | 0.499 | ±0.244 |
| ***Hcc461*** | 0.490 | ±0.101 | 2.089 | ±0.965 | 1.231 | ±0.256 | 0.376 | ±0.145 |
| ***Hcc827*** | 0.751 | ±0.288 | 0.574 | ±0.273 | 0.801 | ±0.327 | 0.150 | ±0.045 |
| ***H1395*** | 0.643 | ±0.071 | 0.859 | ±0.380 | 0.922 | ±0.346 | 0.260 | ±0.048 |
| ***H2126*** | 0.566 | ±0.061 | 0.821 | ±0.287 | 2.964 | ±0.104 | 0.677 | ±0.034 |
| ***H2258*** | 0.784 | ±0.112 | 1.067 | ±0.312 | 1.576 | ±0.553 | 0.377 | ±0.197 |
| ***H2291*** | 1.149 | ±0.136 | 1.192 | ±0.386 | 1.714 | ±1.006 | 0.180 | ±0.054 |
| ***H3255*** | 0.589 | ±0.196 | 0.707 | ±0.142 | 2.014 | ±1.470 | 0.448 | ±0.043 |
| ***Hcc515*** | 0.463 | ±0.145 | 0.445 | ±0.207 | 1.506 | ±0.667 | 0.317 | ±0.107 |
| ***Hcc2302*** | 0.051 | ±0.029 | 0.297 | ±0.057 | 1.282 | ±0.515 | 0.633 | ±0.021 |
| ***H1437*** | 0.270 | ±0.135 | 0.585 | ±0.135 | 1.135 | ±0.309 | 0.451 | ±0.085 |
| ***H1993*** | 0.292 | ±0.108 | 0.613 | ±0.183 | 0.837 | ±0.318 | 0.211 | ±0.078 |
| ***H2009*** | 0.225 | ±0.056 | 0.555 | ±0.115 | 0.820 | ±0.365 | 0.251 | ±0.093 |
| ***H2347*** | 0.449 | ±0.117 | 0.984 | ±0.525 | 0.538 | ±0.027 | 0.165 | ±0.051 |
| ***H2882*** | | 0.533 | | --- | | ±0.313 | 0.518 | ±0.061 | 0.589 | ±0.326 | 0.172 | ±0.036 |
| ***Hcc366*** | 0.355 | ±0.068 | 0.656 | ±0.201 | 0.670 | ±0.270 | 0.481 | ±0.184 |
| **Supplemental Table 1:** Rates of uptake at 5 minutes for each endocytic pathway with standard deviation (STDV) in 29 NSCLC cell lines | | | | | | | | |
