# Supplementary material for: A Systematic Analysis Reveals Heterogeneous Changes in the Endocytic Activities of Cancer Cells
Source: Oxford University Press journal article supplement (doi:10.1158/0008-5472.can-15-0939), 2015-09-11
Supplement: 00085472can150939-sup-147989_1_supp_3041876_nqs1pg.docx [file 00085472can150939-sup-147989_1_supp_3041876_nqs1pg.docx]

|  | **Migration** | **Growth in Soft Agar** | **Adhesion** | | | | | **Proliferation** | | | | |
| --- | --- | --- | --- | --- | --- | --- | --- | --- | --- | --- | --- | --- |
|  | Invasion ratio (50/0uM) | Colony number | P-Lysine | Collagen | Fibronectin | Laminin | Haluronic Acid | Day 0 | Day 1 | Day 3 | Day 4 | Day 5 |
| ***H157*** | None | >300 | 15511 | 11207 | 14651 | 4266 | 4712 | 1 | 1.82 | 8.07 | 11.46 | 14.65 |
| ***H441*** | None | >300 | 8351 | 11306 | 4345 | 3028 | 4939 | 1 | 2.29 | 6.11 | 12.08 | 22.22 |
| ***H1299*** | 0.334 | 124 | 10985 | 5550 | 11330 | 8430 | 5243 | 1 | 2.61 | 15.69 | 37.73 | 51.86 |
| ***H1355*** | 0.041 | >300 | 9295 | 1679 | 10088 | 2421 | 6542 | 1 | 4.28 | 13.06 | 18.05 | 26.34 |
| ***H1792*** | None | 104 | 8923 | 21276 | 14047 | 3995 | 3295 | 1 | 1.76 | 7.62 | 15.15 | 25.13 |
| ***H1819*** | None | None | 4850 | 7052 | 10207 | 5264 | 3803 | 1 | 1.09 | 4.43 | 7.11 | 10.76 |
| ***Hcc44*** | 0.493 | 177 | 11126 | 21130 | 17969 | 6712 | 8045 | 1 | 1.66 | 6.50 | 11.25 | 13.10 |
| ***Hcc4017*** | 0.188 | 69 | 10404 | 25481 | 11606 | 14160 | 7163 | 1 | 1.69 | 5.94 | 8.73 | 12.57 |
| ***A549*** | None | >300 | 14381 | 15922 | 10097 | 9648 | 7610 | 1 | 1.53 | 8.58 | 15.35 | 21.08 |
| ***H2052*** | 0.032 | 57 | 33884 | 43994 | 34475 | 29104 | 17073 | 1 | 1.18 | 5.42 | 8.40 | 10.33 |
| ***H2073*** | None | None | 32463 | 33233 | 20168 | 17099 | 16912 | 1 | 1.49 | 2.14 | 9.49 | 15.65 |
| ***H2122*** | None | >300 | 13275 | 17926 | 7613 | 4838 | 4922 | 1 | 0.75 | 4.46 | 11.72 | 14.39 |
| ***H2172*** | None | >300 | 16988 | 8053 | 9022 | 11713 | 6585 | 1 | 3.09 | 9.20 | 14.19 | 17.08 |
| ***Hcc193*** | None | None | 26744 | 31145 | 18193 | 10315 | 14606 | 1 | 1.37 | 4.88 | 8.93 | 15.05 |
| ***Hcc461*** | 0.154 | None | 42328 | 47412 | 38560 | 31549 | 19122 | 1 | 1.02 | 3.56 | 8.96 | 15.04 |
| ***Hcc827*** | None | 22 | 11693 | 11555 | 12673 | 10745 | 4677 | 1 | 0.949 | 6.00 | 10.09 | 19.79 |
| ***H1395*** | None | >300 | 13392 | 15647 | 14812 | 18896 | 15902 | 1 | 1.07 | 2.19 | 2.55 | 3.38 |
| ***H2126*** | None | >300 | 35086 | 25598 | 25113 | 27468 | 21952 | 1 | 1.73 | 3.97 | 5.44 | 5.78 |
| ***H2258*** | None | >300 | 5639 | 4016 | 3920 | 1972 | 3027 | 1 | 0.993 | 0.97 | 2.07 | 1.72 |
| ***H2291*** | None | >300 | 8388 | 12374 | 3091 | 5049 | 3331 | 1 | 1.07 | 3.32 | 5.03 | 9.22 |
| ***H3255*** | None | None | 23719 | 27771 | 5579 | 9718 | 6669 | 1 | 2.04 | 2.68 | 3.49 | 4.39 |
| ***Hcc515*** | None | None | 20212 | 36116 | 16978 | 15271 | 14937 | 1 | 0.900 | 1.11 | 1.93 | 2.66 |
| ***Hcc2302*** | None | >300 | 3860 | 6151 | 1641 | 882 | 1401 | 1 | 1.02 | 1.47 | 2.19 | 2.34 |
| ***H1437*** | 0.014 | >300 | 6822 | 6973 | 6320 | 3964 | 5781 | 1 | 1.84 | 15.77 | 20.33 | 30.47 |
| ***H1993*** | 0.115 | >300 | 7962 | 14363 | 6106 | 5546 | 5962 | 1 | 1.41 | 8.11 | 9.31 | 13.70 |
| ***H2009*** | None | >300 | 9367 | 10776 | 4865 | 3426 | 4814 | 1 | 3.04 | 12.14 | 30.62 | 48.11 |
| ***H2347*** | 0.030 | 36 | 6169 | 10347 | 1110 | 1740 | 1151 | 1 | 1.24 | 3.65 | 5.85 | 8.57 |
| ***H2882*** | None | None | 13352 | 10412 | 6413 | 6181 | 4872 | 1 | 1.81 | 7.24 | 11.42 | 14.06 |
| ***Hcc366*** | 0.034 | 55 | 11354 | 1909 | 1692 | 1781 | 1761 | 1 | 2.23 | 12.77 | 16.68 | 24.54 |
| **Supplemental Table 2:** Cancerous properties of 29 NSCLC cell lines | | | | | | | | | | | | |
